# Supplementary material
Source: publisher figshare collection journal article supplement (https://gsajournals.figshare.com/ndownloader/files/14799260)
Supplement: Supplementary file 1 [file 14799260]

## Sheet: Sheet1
Table S1. Pierce/PI 41353 RIL population genotype and phenotype data used in QTL analysis. Allele A is from Pierce, allele B is from PI 41353.
PercentFieldCutting	EarlyStemSolidness	LateStemSolidness	PercentInfestation	PercentLabCutting	PercentParasitism	PercentMortality	RIL_ID	wsnp_Ex_c17884_26647952	D_contig37179_75	S1_850963	BS00011810_51	BS00010488_51	S1_65942	IAAV3919	Tdurum_contig19376_154	BS00047515_51	S10_1487263	S1_1256789	S1_448170	BS00059422_51	Tdurum_contig26201_77	Ra_c11910_419	D_GA8KES402HR8TV_187	S1_1510066	S1_1630013	wsnp_BE405749B_Ta_2_1	GENE-0411_723	Excalibur_c5139_150	S1_1561008	S1_3008706	RAC875_rep_c116934_270	Excalibur_rep_c105429_654	BobWhite_c39996_85	Kukri_c54944_116	S1_2616973	Excalibur_c25891_1402	Kukri_c13513_759	Kukri_c2121_1936	S1_3302077	S1_2486580	S19_178324339	IACX9458	S1_3199699	BS00083459_51	S1_1491336	BS00026917_51	S1_5171709	S1_6878721	S1_9744952
								1A.1	1A.1	1A.1	1A.1	1A.1	1A.1	1A.1	1A.1	1A.1	1A.1	1A.1	1A.1	1A.1	1A.1	1A.1	1A.1	1A.1	1A.1	1A.1	1A.1	1A.1	1A.1	1A.1	1A.1	1A.1	1A.1	1A.1	1A.1	1A.1	1A.1	1A.1	1A.1	1A.1	1A.1	1A.1	1A.1	1A.1	1A.1	1A.1	1A.1	1A.1	1A.2
								0	9.24368	13.3061	14.4983	14.4983	14.4983	14.4983	14.4983	14.4983	16.7926	16.7926	16.7926	16.7926	19.3832	19.3832	21.5887	22.4274	22.4274	22.4274	22.4274	22.4274	23.1751	23.1751	23.1751	23.1751	23.1751	25.2023	25.2023	30.3834	30.3834	30.3834	30.3834	30.3834	36.2209	41.8729	41.8729	49.3527	57.2707	66.1424	66.1424	66.1424	0
19.571	3.81111	2.78571	44.7918	17.9945	2.9258	58.8896	SD9-128	B	B	-	B	B	-	B	B	B	-	-	-	B	B	B	B	-	-	B	B	B	-	-	B	B	B	B	-	A	A	A	-	-	-	A	-	A	-	A	-	-	-
22.071	3.6875	2.87857	48.5316	17.7137	9.904	58.7824	SD9-127	B	B	-	B	B	-	B	B	B	-	-	-	B	B	B	B	-	-	B	B	B	-	-	B	B	B	B	-	B	B	B	-	-	-	B	-	B	-	B	-	-	-
19.5801	4.04286	2.65	35.1076	17.5529	4.1249	29.6549	SD9-126	B	B	-	B	B	-	B	B	B	-	-	-	B	B	B	B	-	-	B	B	B	-	-	B	B	B	B	-	B	B	B	-	-	-	B	-	B	-	B	-	-	-
19.4444	4.00556	2.76429	32.2274	15.1471	4.0456	57.5488	SD9-124	A	A	-	A	A	-	A	A	A	-	-	-	A	A	A	A	-	-	A	A	A	-	-	A	A	A	A	-	A	A	A	-	-	-	A	-	A	-	A	-	-	-
21.1821	4.00556	2.91154	49.0299	22.1291	3.103	43.4726	SD9-123	B	B	-	B	B	-	B	B	B	-	-	-	B	B	B	B	-	-	B	B	B	-	-	B	B	B	B	-	B	B	B	-	-	-	B	-	B	-	B	-	-	-
13.1912	3.55	2.38333	35.5533	17.8926	4.6371	48.5176	SD9-121	B	B	-	B	B	-	B	B	B	-	-	-	B	B	B	B	-	-	B	B	-	-	-	B	B	B	B	-	B	B	B	-	-	-	B	-	B	-	B	-	-	-
17.9263	4.2	2.55714	41.061	19.8218	4.8778	51.3972	SD9-120	B	B	-	B	B	-	B	B	B	-	-	-	B	B	B	B	-	-	B	B	B	-	-	B	B	B	B	-	B	B	B	-	-	-	B	-	B	-	B	-	-	-
32.8511	3.67222	2.875	55.071	28.0945	5.7411	49.251	SD9-119	A	A	-	B	-	-	-	B	B	-	-	-	-	B	B	-	-	-	B	-	B	-	-	B	B	B	B	-	-	B	B	-	-	-	A	-	A	-	A	-	-	-
15.132	4.07143	2.53333	33.7562	18.5405	1.3549	42.2993	SD9-118	A	A	-	A	A	-	A	A	-	-	-	-	A	A	A	A	-	-	A	A	-	-	-	A	A	A	A	-	B	B	B	-	-	-	B	-	B	-	B	-	-	-
13.3507	3.925	2.51667	28.5214	11.7625	6.9554	53.4094	SD9-117	A	A	-	A	A	-	A	A	A	-	-	-	A	A	A	A	-	-	A	A	A	-	-	A	A	A	A	-	A	A	A	-	-	-	A	-	A	-	A	-	-	-
22.109	3.7875	2.62857	47.3692	23.6496	6.2765	48.8797	SD9-115	B	B	-	B	B	-	B	B	B	-	-	-	B	B	B	B	-	-	B	B	B	-	-	B	B	B	B	-	B	B	B	-	-	-	B	-	B	-	A	-	-	-
11.0775	4.5	2.13077	22.7336	7.502	1.1808	55.3379	SD9-114	A	A	-	A	A	-	A	A	A	-	-	-	A	A	A	A	-	-	A	A	A	-	-	A	A	A	A	-	A	A	A	-	-	-	A	-	A	-	A	-	-	-
22.5556	3.86667	2.85	42.6962	24.6712	2.7028	47.0151	SD9-113	A	B	-	B	B	-	B	B	B	-	-	-	B	B	B	B	-	-	A	A	A	-	-	A	A	A	A	-	B	B	B	-	-	-	B	-	B	-	B	-	-	-
12.1177	4.375	2.675	41.8028	17.3586	4.5416	56.1635	SD9-111	A	A	-	A	A	-	A	A	A	-	-	-	A	A	A	A	-	-	-	A	A	-	-	A	A	A	A	-	A	A	A	-	-	-	A	-	A	-	A	-	-	-
33.3023	3.4	2.45385	49.5198	30.9929	4.8159	31.6164	SD9-110	B	B	-	B	B	-	B	B	B	-	-	-	B	B	B	B	-	-	B	B	B	-	-	B	B	B	B	-	B	B	B	-	-	-	B	-	B	-	B	-	-	-
9.4444	3.6	2.83571	35.2792	14.3843	6.9966	58.6076	SD9-109	B	B	-	B	B	-	B	B	B	-	-	-	B	B	B	B	-	-	B	B	B	-	-	B	B	B	B	-	B	B	B	-	-	-	B	-	B	-	B	-	-	-
13.2622	3.17857	2.17143	26.2404	13.3555	12.3855	41.1603	SD9-108	A	A	-	B	-	-	-	B	B	-	-	-	-	B	B	-	-	-	B	-	-	-	-	B	B	-	-	-	A	B	B	-	-	-	A	-	-	-	A	-	-	-
21.1821	3.5	2.71923	44.5857	20.8269	4.4268	53.1934	SD9-105	A	A	-	B	-	-	-	B	B	-	-	-	-	B	B	-	-	-	B	-	B	-	-	-	B	B	B	-	A	B	B	-	-	-	A	-	A	-	A	-	-	-
14.651	4.06111	2.75	36.3298	18.1185	5.0057	55.8794	SD9-104	B	A	-	A	A	-	A	A	A	-	-	-	A	A	A	B	-	-	B	B	B	-	-	B	B	B	B	-	B	B	B	-	-	-	B	-	B	-	A	-	-	-
24.5154	3.07778	2.74231	32.8696	17.6995	1.1754	49.3371	SD9-103	A	A	-	A	A	-	A	A	A	-	-	-	A	A	A	A	-	-	A	A	A	-	-	A	A	A	A	-	A	A	A	-	-	-	A	-	A	-	A	-	-	-
16.6667	3.62857	2.6	47.1458	19.0089	4.413	58.2705	SD9-101	A	B	-	B	B	-	B	B	B	-	-	-	-	B	B	-	-	-	-	-	B	-	-	B	-	-	B	-	A	B	B	-	-	-	A	-	A	-	A	-	-	-
25.1356	-	2.3	46.8321	22.8193	4.7657	53.7436	SD9-100	B	B	-	B	B	-	B	B	B	-	-	-	B	-	B	B	-	-	B	B	B	-	-	B	B	B	B	-	B	B	B	-	-	-	B	-	B	-	A	-	-	-
21.1111	3.07222	2.63333	42.5881	25.2684	2.0983	42.644	SD9-99	A	A	-	A	A	-	A	A	A	-	-	-	A	A	-	A	-	-	A	A	A	-	-	A	A	A	A	-	A	A	A	-	-	-	A	-	A	-	A	-	-	-
17.4913	4.4375	2.55	30.6682	17.2789	10.4863	30.4674	SD9-98	B	B	-	B	B	-	B	B	B	-	-	-	B	B	B	B	-	-	B	B	-	-	-	B	B	B	B	-	B	B	B	-	-	-	B	-	B	-	B	-	-	-
10.5556	4.25	2.59615	33.1195	17.9572	2.7945	34.2601	SD9-97	B	B	-	B	B	-	B	B	B	-	-	-	B	B	B	B	-	-	B	B	B	-	-	B	B	B	B	-	B	B	B	-	-	-	B	-	B	-	B	-	-	-
8.9602	3.6875	3.15	42.7912	12.8388	4.7035	62.3837	SD9-96	B	B	-	B	B	-	B	B	B	-	-	-	B	B	B	B	-	-	B	B	B	-	-	B	B	B	B	-	A	B	B	-	-	-	A	-	A	-	A	-	-	-
28.5399	3.7375	2.90769	41.956	20.2858	7.5182	50.2014	SD9-95	A	A	-	A	A	-	A	A	A	-	-	-	A	A	A	A	-	-	A	A	A	-	-	A	A	A	A	-	A	A	A	-	-	-	A	-	A	-	A	-	-	-
15.6331	3.74286	3.02308	40.1016	15.1235	7.6059	51.6346	SD9-94	B	B	-	B	B	-	B	B	B	-	-	-	B	B	B	B	-	-	B	B	B	-	-	B	B	B	B	-	A	A	A	-	-	-	A	-	A	-	A	-	-	-
16.0399	3.47857	2.61667	51.1816	19.8196	3.396	63.8445	SD9-93	A	A	A	A	A	A	A	A	A	A	A	A	A	A	A	A	A	A	A	A	A	A	A	A	A	A	A	A	A	A	A	A	A	A	A	A	A	A	A	A	A	A
24.0955	3.39444	2.47143	56.6961	22.5701	9.2405	51.0547	SD9-92	A	A	A	A	A	A	A	A	A	A	A	A	A	A	A	A	A	A	-	A	A	A	A	A	A	A	A	A	A	A	A	A	A	A	A	A	A	A	A	A	A	A
13.4579	3.98333	3.08571	42.906	20.4325	5.1139	49.557	SD9-91	A	A	A	B	-	-	-	B	B	-	B	-	-	B	B	-	A	-	B	-	-	-	-	B	-	B	B	-	A	B	B	-	-	A	A	-	A	A	A	-	-	-
16.6044	4.08333	3.18333	29.0801	12.2404	0.9394	53.8123	SD9-90	B	B	B	B	B	B	B	B	B	B	B	B	B	B	B	B	B	B	B	B	B	B	B	B	B	B	B	B	B	B	B	B	B	B	B	B	B	B	B	B	B	B
18.2998	3.22222	2.37143	43.5547	23.0531	0.5011	49.6144	SD9-89	A	A	A	A	A	A	A	A	A	A	A	A	A	A	A	A	A	A	-	A	A	A	A	A	A	A	A	A	A	A	A	A	A	A	A	A	A	A	A	A	A	A
29.7778	3.025	2.78462	44.8669	31.4743	1.9565	28.9149	SD9-88	A	A	A	A	A	A	A	A	A	A	-	A	A	A	A	A	A	A	A	A	A	A	A	A	A	A	A	A	A	A	A	A	A	A	A	A	B	-	B	B	B	A
30	3.35	2.68571	46.6496	24.2118	3.4357	47.8461	SD9-87	B	B	-	B	B	B	B	B	B	B	B	B	B	B	B	B	B	B	B	B	B	B	B	B	B	B	B	B	B	B	B	B	B	B	B	B	B	B	B	B	B	B
23.3333	3.2625	2.21538	34.9944	15.6885	8.6036	44.7139	SD9-86	B	B	B	B	B	B	B	B	B	B	-	B	B	B	B	B	B	B	B	B	B	B	B	B	B	B	B	B	B	B	B	B	B	B	B	B	B	B	B	B	B	B
12.7066	4.13333	2.88462	35.3101	18.4293	2.359	46.8344	SD9-85	B	B	-	B	B	B	B	B	B	B	B	B	B	B	B	B	B	-	B	B	B	B	B	B	B	B	A	A	A	A	A	A	A	A	A	A	A	A	A	A	A	B
19.9933	3.02222	2.06667	31.5234	14.7343	3.1935	58.4638	SD9-84	A	A	A	A	A	A	A	A	A	A	A	A	A	A	A	A	A	A	A	A	A	A	A	A	A	A	A	A	A	A	A	A	A	A	A	A	A	-	B	B	B	B
28.8889	3.53333	2.65	49.5087	16.0582	2.9026	63.4908	SD9-83	A	A	A	A	A	A	A	A	A	A	A	A	A	A	A	A	A	A	A	A	A	A	A	A	A	A	A	A	A	A	A	A	A	A	A	A	A	A	A	A	A	A
16.1111	3.25	2.75833	44.3895	27.001	5.7713	34.553	SD9-81	A	A	A	A	A	A	A	A	A	A	A	A	A	A	A	A	A	A	A	A	A	-	A	A	A	A	A	A	A	A	A	A	A	A	A	A	A	A	A	A	A	B
26.1821	3.57778	2.94167	44.654	26.1142	2.7893	36.4154	SD9-80	A	A	-	-	A	-	A	A	A	-	-	-	A	B	B	-	-	-	B	-	B	-	-	B	B	B	B	-	A	B	B	-	-	-	A	-	A	-	A	-	-	-
17.2932	3.57778	2.47857	33.6665	14.4133	4.5428	54.0204	SD9-78	A	A	-	A	A	-	A	A	A	-	-	-	A	A	A	A	-	-	A	A	A	-	-	A	A	A	A	-	A	A	A	-	-	-	A	-	A	-	B	-	-	-
6.9357	3.6875	2.375	35.346	9.6467	10.1367	44.3151	SD9-77	B	A	A	A	A	A	A	A	A	A	A	A	A	B	B	B	B	B	B	B	B	-	B	B	B	B	B	B	B	B	B	B	B	B	B	B	B	B	B	B	B	B
17.2932	3.55	2.925	35.7705	18.516	10.8818	34.3259	SD9-76	A	A	A	A	A	A	A	A	A	A	A	A	A	A	A	A	A	A	A	A	A	-	A	A	A	A	A	A	A	A	A	A	A	A	A	A	A	A	A	A	A	A
20.3333	3.48571	2.68462	33.3678	18.9275	15.9262	17.0609	SD9-75	A	A	A	A	A	A	A	A	A	A	A	A	A	A	A	A	A	A	A	A	A	-	A	A	A	A	A	A	A	A	A	A	A	A	A	A	A	A	A	A	A	A
12.7442	4	2.45	37.8801	12.4928	7.0524	59.7286	SD9-74	A	A	A	A	A	A	A	A	A	A	A	A	A	A	A	A	A	A	A	A	A	A	A	A	A	A	A	A	A	A	A	A	A	A	A	A	A	-	B	B	B	B
14.7778	-	3.56538	43.6658	18.2547	5.8697	53.7103	SD9-72	B	B	B	B	B	B	B	B	B	B	B	B	B	B	B	B	B	B	B	B	B	B	B	B	B	B	A	A	A	A	A	A	A	A	A	A	A	-	A	A	A	A
17.2222	3.6	2.79615	35.8776	20.889	3.2378	39.6128	SD9-68	A	A	-	A	A	-	A	A	A	-	-	-	A	A	A	A	-	-	A	A	A	-	-	A	A	A	A	-	B	B	B	-	-	-	B	-	B	-	A	-	-	-
24.4444	3.5	2.40385	41.0851	16.0626	4.8813	62.2749	SD9-67	A	A	A	A	A	A	A	A	A	A	A	A	A	A	A	A	A	A	A	A	A	A	A	A	A	A	A	A	A	A	A	A	A	A	A	A	A	A	A	A	A	A
10.3333	3.85	2.54167	36.9092	15.1094	5.8254	51.3353	SD9-65	A	B	-	B	B	-	B	B	B	-	-	-	A	A	A	A	-	-	A	A	A	-	-	A	A	A	A	-	A	A	A	-	-	-	A	-	A	-	A	-	-	-
18.4043	3.6	2.24231	38.1837	22.1025	2.6335	51.0492	SD9-64	B	B	B	B	B	B	B	B	B	B	-	B	B	B	B	B	B	B	B	B	B	B	B	B	B	B	B	B	B	B	B	B	B	B	B	B	B	A	A	A	A	A
23.6667	3.16429	2.40714	39.9114	24.371	8.0412	38.201	SD9-62	B	B	B	B	B	B	B	B	B	B	-	B	B	B	B	B	B	B	B	B	B	B	B	B	B	B	B	B	B	B	B	B	B	B	B	B	B	-	B	B	B	B
14.7778	3.75	2.7	37.4445	16.4472	5.2982	50.808	SD9-61	B	A	-	B	-	-	-	B	B	-	-	-	-	B	B	B	-	-	B	B	B	-	-	B	B	B	B	-	B	B	B	-	-	-	B	-	B	-	B	-	-	-
23.3333	2.9	2.41923	41.8193	22.441	8.2742	39.2567	SD9-60	B	B	B	B	B	B	B	B	B	B	B	B	B	B	B	B	B	B	B	B	B	B	B	B	B	B	B	B	B	B	B	B	B	B	B	B	B	B	B	B	B	-
20.071	3.7125	2.49615	40.3774	16.1709	4.3072	52.2385	SD9-59	A	A	A	A	A	A	A	A	A	A	A	A	A	A	A	A	A	A	A	A	A	A	A	A	A	A	A	A	A	A	A	A	A	A	A	A	A	A	A	A	A	A
13.5399	3.25	2.79286	40.331	20.4171	4.2294	53.0909	SD9-58	A	A	A	A	A	A	A	A	A	A	A	A	A	A	A	A	A	A	A	A	A	A	A	A	A	A	A	A	A	A	A	A	A	A	A	A	A	A	A	A	A	A
22.8488	3.1625	2.21429	43.4006	23.7215	1.5853	47.0538	SD9-56	B	B	B	B	B	B	B	B	B	B	B	B	B	B	B	B	B	B	B	B	B	B	B	B	B	B	B	B	A	A	A	A	A	A	A	A	A	A	A	A	A	A
7.7778	4.15714	2.56538	32.9723	13.0646	2.1025	56.1244	SD9-55	B	B	-	B	B	-	B	B	B	-	-	-	B	B	B	B	-	-	B	B	B	-	-	B	B	B	B	-	A	A	A	-	-	-	A	-	A	-	A	-	-	-
10.1356	3.76429	3.05833	35.3284	12.7924	7.8854	54.4022	SD9-54	B	B	B	B	B	B	B	B	B	B	B	B	B	B	B	B	B	B	B	B	B	-	B	B	B	B	B	B	-	B	B	B	B	B	B	B	B	B	B	-	B	B
19.7932	3.35	2.82692	46.7998	19.1975	4.813	45.4758	SD9-53	B	B	-	B	B	B	B	B	B	B	B	B	B	B	B	B	B	B	B	B	B	-	B	B	B	B	B	B	B	B	-	B	B	B	B	B	B	-	B	B	B	B
19.0621	-	2.675	40.5245	24.6025	4.4185	35.2543	SD9-52	A	A	-	B	-	-	-	B	B	-	B	-	-	B	B	-	A	-	B	-	-	B	-	B	B	B	B	-	A	B	B	-	-	-	A	A	A	A	A	-	-	-
11.6667	4.56667	3.225	31.8318	8.3222	9.9177	59.1324	SD9-51	B	B	B	B	B	B	B	B	B	A	A	A	A	A	A	B	B	B	B	B	B	B	B	B	B	B	B	B	B	B	B	B	B	B	B	B	B	B	B	B	B	A
18.8491	3.10455	2.50833	46.2657	18.3449	3.3477	57.8005	SD9-49	B	A	-	A	A	-	A	A	A	-	-	-	A	A	A	A	-	-	A	A	A	-	-	B	B	B	B	-	A	B	B	-	-	-	A	-	A	-	A	-	-	-
28.4043	3.2	2.5	43.1214	15.8718	4.2415	59.2652	SD9-48	A	B	B	B	B	B	B	B	B	B	B	B	B	B	B	-	-	-	B	-	-	-	-	B	B	B	B	-	B	B	B	B	B	B	B	B	B	B	B	B	B	B
25.6265	2.77778	2.7	47.8033	23.6981	6.525	45.5553	SD9-47	B	A	A	A	A	A	A	A	A	A	A	A	A	B	B	B	B	B	B	B	B	B	B	B	B	B	B	B	B	B	B	B	B	B	B	B	B	B	B	B	B	B
18.1111	2.77778	2.36667	39.8212	24.1763	2.5865	39.6888	SD9-46	B	B	B	B	B	B	B	B	B	B	B	B	B	B	B	B	B	B	B	B	B	B	B	B	B	B	B	B	B	B	B	B	B	B	B	B	B	B	B	B	B	A
22.2932	4.25714	3.23846	43.3529	22.2089	4.6785	51.8275	SD9-45	B	B	-	B	B	-	B	B	B	-	-	-	B	B	B	B	-	-	B	B	B	-	-	B	B	B	B	-	B	B	B	-	-	-	B	-	B	-	B	-	-	-
13.4599	3.98333	3.58333	37.0375	19.9924	1.3083	42.2326	SD9-44	B	B	B	B	B	B	B	B	B	B	B	B	B	B	-	B	B	B	B	B	B	B	B	B	B	B	B	B	B	B	B	B	B	B	B	B	B	B	B	B	B	B
27.0801	3.66111	2.72857	50.4202	26.1756	7.0349	43.5511	SD9-43	A	A	A	A	A	A	A	A	A	A	A	A	A	A	A	A	A	A	A	A	A	A	A	A	A	A	A	A	A	A	A	A	A	A	A	A	A	A	A	A	A	A
19.4444	3.63333	2.70769	31.757	19.4592	5.1268	32.5321	SD9-42	B	B	-	B	B	B	B	B	B	B	B	B	B	B	B	B	B	B	B	B	B	B	B	B	B	B	B	B	A	A	B	-	-	-	A	-	A	A	A	-	-	B
14.7778	3.22143	2.56667	46.8723	18.745	2.6627	57.6467	SD9-41	B	B	B	B	B	B	B	B	B	B	-	B	B	B	B	B	B	-	B	B	B	B	B	B	B	B	B	B	B	B	B	B	B	B	B	B	B	B	B	B	B	-
14.2467	3.4625	2.9	40.1883	16.9617	2.989	49.9084	SD9-40	B	A	A	A	A	A	A	A	A	B	B	B	B	B	B	B	B	B	B	B	B	B	B	B	B	B	B	B	B	B	B	B	B	B	B	B	B	B	B	B	B	B
14.1331	3.6	2.67143	29.1599	20.0271	0.6617	38.1349	SD9-39	B	B	B	B	B	B	B	B	B	B	B	B	B	B	B	B	B	B	B	B	B	B	B	B	B	B	B	B	A	A	A	A	A	A	A	A	A	A	A	A	A	B
17.3399	3.96667	2.26429	44.0068	18.5495	8.8709	52.751	SD9-38	A	A	A	A	A	A	A	A	A	A	A	A	A	A	A	A	A	A	A	A	A	A	A	A	A	A	A	A	A	A	A	A	A	A	A	A	A	-	B	B	B	B
21.0066	2.75	2.63333	42.7123	24.9962	2.0499	46.2419	SD9-37	A	A	A	A	A	A	A	A	A	A	A	A	A	A	A	A	A	A	-	A	A	A	A	A	A	A	A	A	A	A	A	A	A	A	A	A	A	A	A	A	A	B
18.8266	3.21364	2.99286	40.4418	21.8136	6.8671	40.8535	SD9-36	B	A	A	A	A	A	A	A	A	B	B	B	B	B	B	B	B	B	B	B	B	B	B	B	B	B	B	B	B	B	B	B	B	B	B	B	B	B	B	B	B	B
14.2222	3.08333	2.55	32.6637	15.9367	5.1162	51.0742	SD9-35	A	A	A	A	A	A	A	A	A	A	A	A	A	A	A	A	A	-	A	A	A	A	A	A	A	A	A	A	A	A	A	A	A	A	A	A	A	A	A	A	A	B
16.1821	2.85714	2.26667	43.7376	22.3449	6.0338	43.1043	SD9-34	A	A	-	B	-	-	-	B	B	-	-	-	-	B	B	-	-	-	B	-	B	B	-	B	B	B	B	-	A	B	B	-	-	-	A	-	A	A	A	A	-	B
8.5801	3.94286	2.7	35.3063	10.6525	5.4914	64.3934	SD9-33	B	B	B	B	B	B	B	B	B	B	B	B	B	B	B	B	B	B	B	B	B	B	B	B	B	B	B	B	B	B	B	B	B	B	B	B	B	B	B	B	B	B
11.1111	3.3	2.93333	38.3265	17.8198	9.6565	46.1036	SD9-32	B	B	-	B	B	B	B	B	B	B	B	B	B	B	B	B	B	B	B	B	B	B	B	B	B	B	B	B	B	B	B	B	B	B	B	B	B	B	B	B	B	A
15.7622	3.58889	2.83333	40.8815	18.522	4.3751	61.0136	SD9-31	A	A	A	A	A	A	A	A	A	A	A	A	A	A	A	A	A	A	A	A	A	A	A	A	A	A	A	A	B	B	B	B	B	B	B	B	B	-	B	B	B	A
16.6667	3.48571	2.31667	42.6988	16.9691	14.415	31.4565	SD9-30	A	A	A	A	A	A	A	A	A	A	A	A	A	A	A	A	A	A	A	A	A	A	A	-	A	A	A	A	A	A	A	A	A	A	A	A	A	A	A	A	A	B
26.6667	2.76667	2.47143	42.2031	23.1671	3.6712	37.9528	SD9-29	B	B	-	B	B	B	B	B	B	B	-	B	B	B	B	B	B	B	B	B	B	B	B	B	B	B	B	B	B	B	B	B	B	-	B	B	B	-	B	B	B	B
26.7377	3.65	2.45	41.831	25.9033	5.3201	31.7408	SD9-28	B	B	B	B	B	B	B	B	B	B	B	B	B	B	B	B	B	B	B	B	B	B	B	B	B	B	B	B	B	B	B	B	B	-	B	B	B	B	B	B	B	A
7.7778	3.3875	2.34231	35.4559	14.5096	8.2127	52.2199	SD9-27	A	A	A	A	A	A	A	A	A	A	A	A	A	A	A	A	A	A	A	A	A	A	A	A	A	A	A	A	A	A	A	A	A	A	A	-	A	A	A	A	A	-
22.8488	3.86667	2.88077	38.7226	18.8517	2.9698	47.5281	SD9-26	B	A	A	A	A	A	A	A	A	A	A	A	A	B	B	B	B	B	B	B	B	B	B	B	B	B	B	B	B	B	B	B	B	B	B	B	B	B	B	B	B	B
12.2222	3.85	2.91154	27.3642	12.5056	4.1414	59.5805	SD9-25	B	A	A	B	B	A	A	A	-	B	-	B	B	B	B	B	B	B	B	B	B	B	B	B	B	B	B	B	B	B	B	B	B	B	B	B	B	B	B	B	B	-
13.6667	3.3125	2.87692	43.1213	15.6357	6.714	46.5891	SD9-24	B	B	B	B	B	B	B	B	B	B	B	B	B	B	B	B	B	B	B	B	B	B	B	B	B	B	B	B	B	B	B	B	B	B	-	B	B	B	B	B	B	-
18.3333	2.975	2.30769	37.6456	16.9768	8.252	47.7374	SD9-22	A	B	A	A	A	A	A	-	A	A	A	A	A	A	A	A	A	A	-	A	A	A	A	A	A	-	A	A	A	A	A	A	A	A	A	A	-	A	A	A	A	A
24.1331	2.9375	2.78333	43.1634	18.8651	0.4813	58.4374	SD9-19	A	A	A	A	A	A	A	A	A	A	A	A	A	A	A	A	A	A	A	A	A	A	A	A	A	A	A	A	A	A	A	A	A	A	A	A	A	A	A	A	A	A
16.2467	3.48333	2.91667	39.7147	18.5336	6.5115	47.6759	SD9-18	B	B	B	B	B	B	B	B	B	B	-	B	B	B	B	B	B	B	B	B	B	B	B	B	B	B	B	B	B	B	B	B	B	-	B	B	B	-	B	B	B	B
26.8243	3.35	2.11538	38.924	26.5047	2.6874	38.2665	SD9-17	B	B	B	B	B	B	B	B	B	B	B	B	B	B	B	B	B	B	B	B	B	B	B	B	B	B	B	B	B	B	B	B	B	B	B	B	B	B	B	B	B	B
8.8889	4.17778	2.93333	36.3988	8.708	7.2195	66.6385	SD9-16	A	A	A	A	A	A	A	A	A	A	A	A	A	A	A	A	A	A	A	A	A	A	A	A	A	A	A	A	A	A	A	A	A	A	A	A	A	A	A	A	A	A
20.8889	3	2.6	45.0538	16.1229	15.3334	52.2485	SD9-14	B	A	-	A	A	-	A	A	A	-	-	-	A	B	B	B	-	-	B	B	B	-	-	B	B	B	B	-	A	B	B	-	-	-	A	-	A	-	A	-	-	-
34.3733	3.24444	2.96538	44.8589	25.1189	5.164	39.9943	SD9-13	B	B	B	B	B	B	B	B	B	B	-	B	B	B	B	B	B	B	B	B	B	-	B	B	B	B	B	B	B	B	B	B	B	B	B	B	B	B	B	B	B	-
16.1111	3.03333	2.99167	41.0827	19.968	9.18	43.6719	SD9-12	A	A	-	B	-	-	-	B	B	-	-	-	-	B	B	-	A	A	B	-	-	-	-	B	B	B	B	-	A	B	B	-	-	B	A	A	A	A	A	-	-	A
23.8889	3.43571	2.75	34.7813	20.4178	11.7901	31.1988	SD9-11	A	A	A	A	A	A	A	A	A	A	A	A	A	A	A	A	A	-	A	A	A	A	A	A	A	A	A	A	A	A	A	A	A	A	A	A	A	A	A	A	A	B
19.9913	3.26667	2.85	43.4296	21.3585	6.3879	44.6189	SD9-10	B	B	B	B	B	-	B	B	B	B	B	B	B	B	B	B	B	B	B	B	B	B	B	B	B	B	B	B	B	B	B	B	B	B	B	B	B	-	B	B	B	B
19.6289	2.8	2.75	41.7305	15.659	13.2186	52.9984	SD9-9	B	B	B	B	B	B	B	B	B	B	B	B	B	B	B	B	B	-	B	B	B	-	B	B	B	B	B	B	B	B	B	B	B	A	A	A	A	-	A	-	-	A
12.4288	3.61667	2.63333	35.2993	11.7689	6.0799	39.3996	SD9-7	A	A	A	A	A	A	A	A	A	A	A	A	A	A	A	A	A	A	A	A	A	A	A	A	-	A	A	A	A	A	A	A	A	A	A	A	A	A	A	A	A	A
18.4047	3.7	3.00455	37.1427	18.1458	6.2506	47.1076	SD9-6	B	A	A	A	A	A	A	A	A	A	A	A	A	A	A	B	B	B	B	B	B	B	B	B	B	B	B	B	B	B	B	B	B	B	B	B	B	B	B	B	B	A
22.6265	3.43889	2.58571	46.6466	25.5029	2.9245	40.222	SD9-4	B	B	B	B	B	B	B	-	B	B	B	B	B	B	B	B	B	B	B	B	B	B	B	B	B	-	B	B	B	B	B	B	B	B	B	B	B	A	B	B	B	B
23.7377	-	2.85714	43.1406	31.0707	2.929	29.1554	SD9-3	B	B	B	B	B	B	B	B	B	B	B	B	B	-	B	B	B	B	B	B	B	B	B	B	B	B	B	B	B	B	B	B	B	B	B	B	B	B	B	B	B	B
11.8733	3.63571	2.55	31.8947	13.7387	6.4097	58.7979	SD9-2	B	B	B	B	B	B	B	B	B	B	B	B	B	B	B	B	B	B	B	B	B	B	B	B	B	B	B	B	-	B	B	B	B	B	B	B	B	B	B	-	B	A
20.0174	3.5	2.42857	45.6053	22.785	8.1755	41.9677	SD9-1	B	A	A	A	A	A	A	A	A	A	A	A	A	A	A	B	B	B	B	B	B	B	B	B	B	B	B	B	-	B	B	B	B	B	B	B	B	B	B	B	B	A
[truncated: 2,825 more columns]
